# Supplementary material
Source: PubMed Central journal article supplement (PMC5487613)
Supplement: AAC.00442-17_zac007176326s1.pdf [file AAC.00442-17_zac007176326s1.pdf]

**Supporting information for**  
**Towards Elimination of Pin-tract Infections: Novel Antibacterial Coating on Orthopaedic**  
**Wires**

Dmitry Gil,<sup>a</sup> Sergey Shuvaev,<sup>b</sup> Anastasia Frank-Kamenetskii,<sup>a</sup> Vladimir Reukov,<sup>a,c</sup> Christopher Gross,<sup>d</sup> Alexey Vertegel<sup>a#</sup>

<sup>a</sup> Department of Bioengineering, Clemson University, 301 Rhodes Hall, Clemson, SC, USA

<sup>b</sup> Department of Chemistry, Durham University, South Road, Durham, UK

<sup>c</sup> Institute for Biological Interfaces of Engineering, Clemson University, 301 Rhodes Hall, Clemson, SC, USA

<sup>d</sup> Department of Orthopaedics, Medical University of South Carolina, 96 Jonathan Lucas Street, Charleston, SC, USA

#corresponding author: [vertege@clemson.edu](mailto:vertege@clemson.edu)

**Supporting results:**

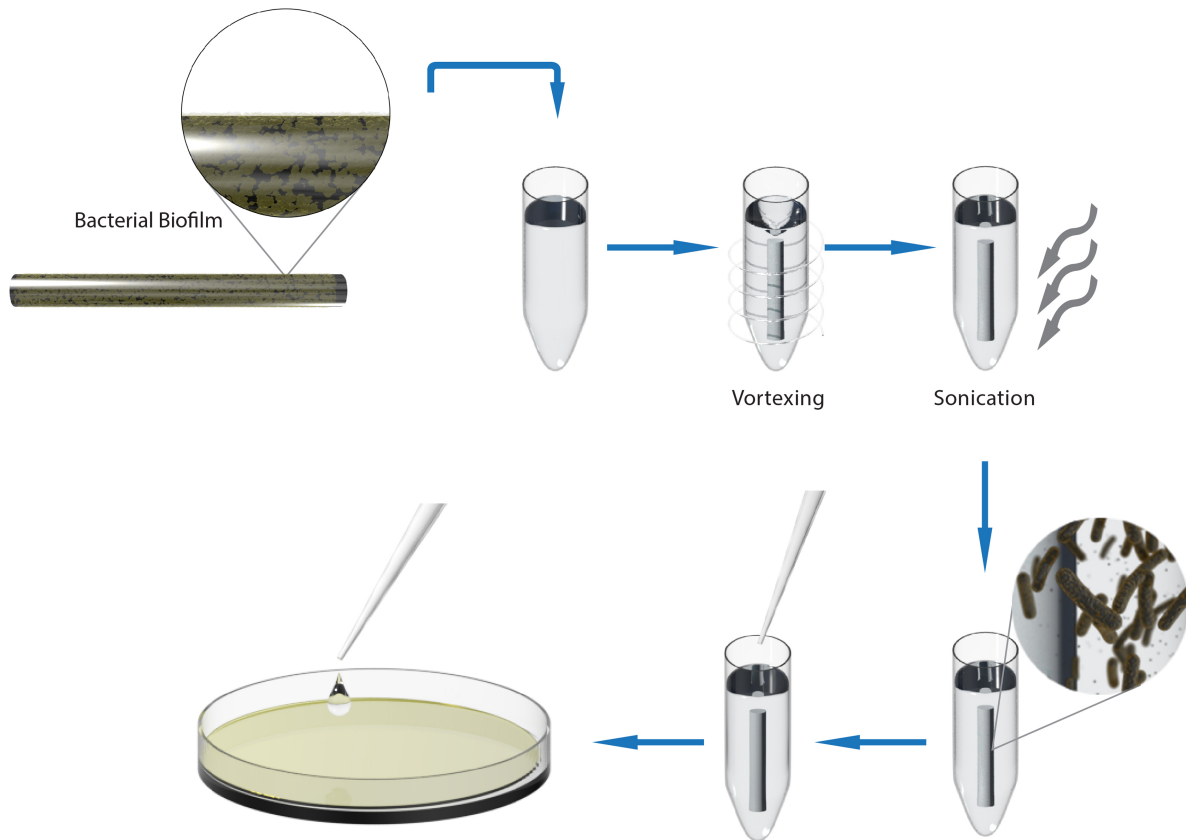

**Figure S1.** The protocol used to dislodge bacteria from the surface of the wires.

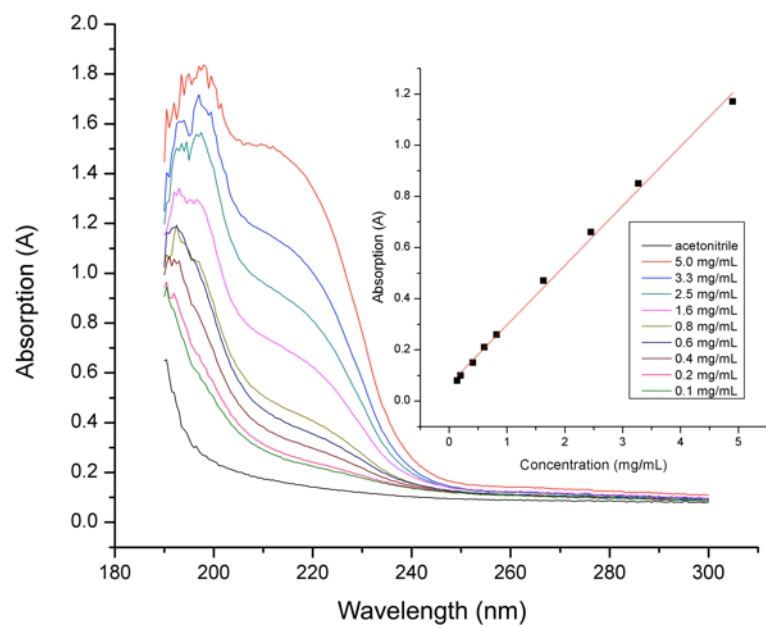

**Figure S2.** Calibration curve for monolaurin used in this study.

**Table S1.** Number of viable and dead osteoblasts lodging on plain and monolaurin-coated K-wires determined by Live/Dead<sup>®</sup> assay.

|                     | <b>Viable cells,<br/>log(cell number)</b> | <b>P-value</b>  | <b>Dead cells,<br/>log(cell number)</b> | <b>P-value</b>  | <b>Total number,<br/>log(cell number)</b> | <b>P-value</b>  |
|---------------------|-------------------------------------------|-----------------|-----------------------------------------|-----------------|-------------------------------------------|-----------------|
| <b>Plain wires</b>  | 5.41±4.84                                 | P=0.419,<br>n=6 | 3.19±2.59                               | P=0.409,<br>n=6 | 5.42±4.84                                 | P=0.411,<br>n=6 |
| <b>Coated wires</b> | 5.34±5.01                                 |                 | 3.12±2.71                               |                 | 5.34±5.01                                 |                 |

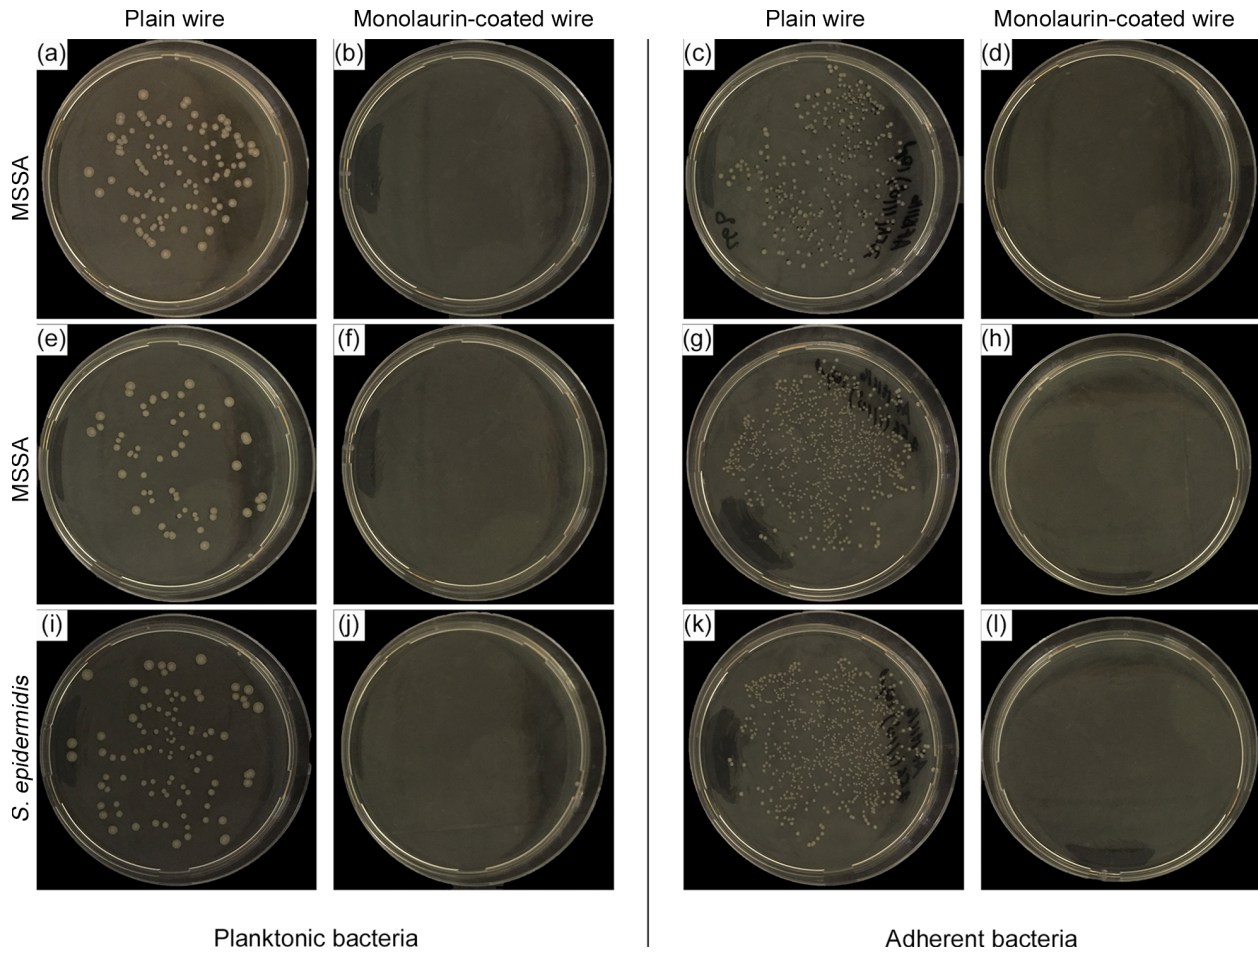

**Figure S3.** Representative photos of recultivated bacteria incubated with the plain and monolaurin-coated K-wires. (a), (c) MSSA incubated with plain wire; (b), (d) MSSA incubated with monolaurin-coated wire; (e), (g) MRSA incubated with plain wire; (f), (h) MRSA incubated with monolaurin-coated wire; (i), (k) *S. epidermidis* incubated with plain wire; (j), (l) *S. epidermidis* incubated with monolaurin-coated wire.

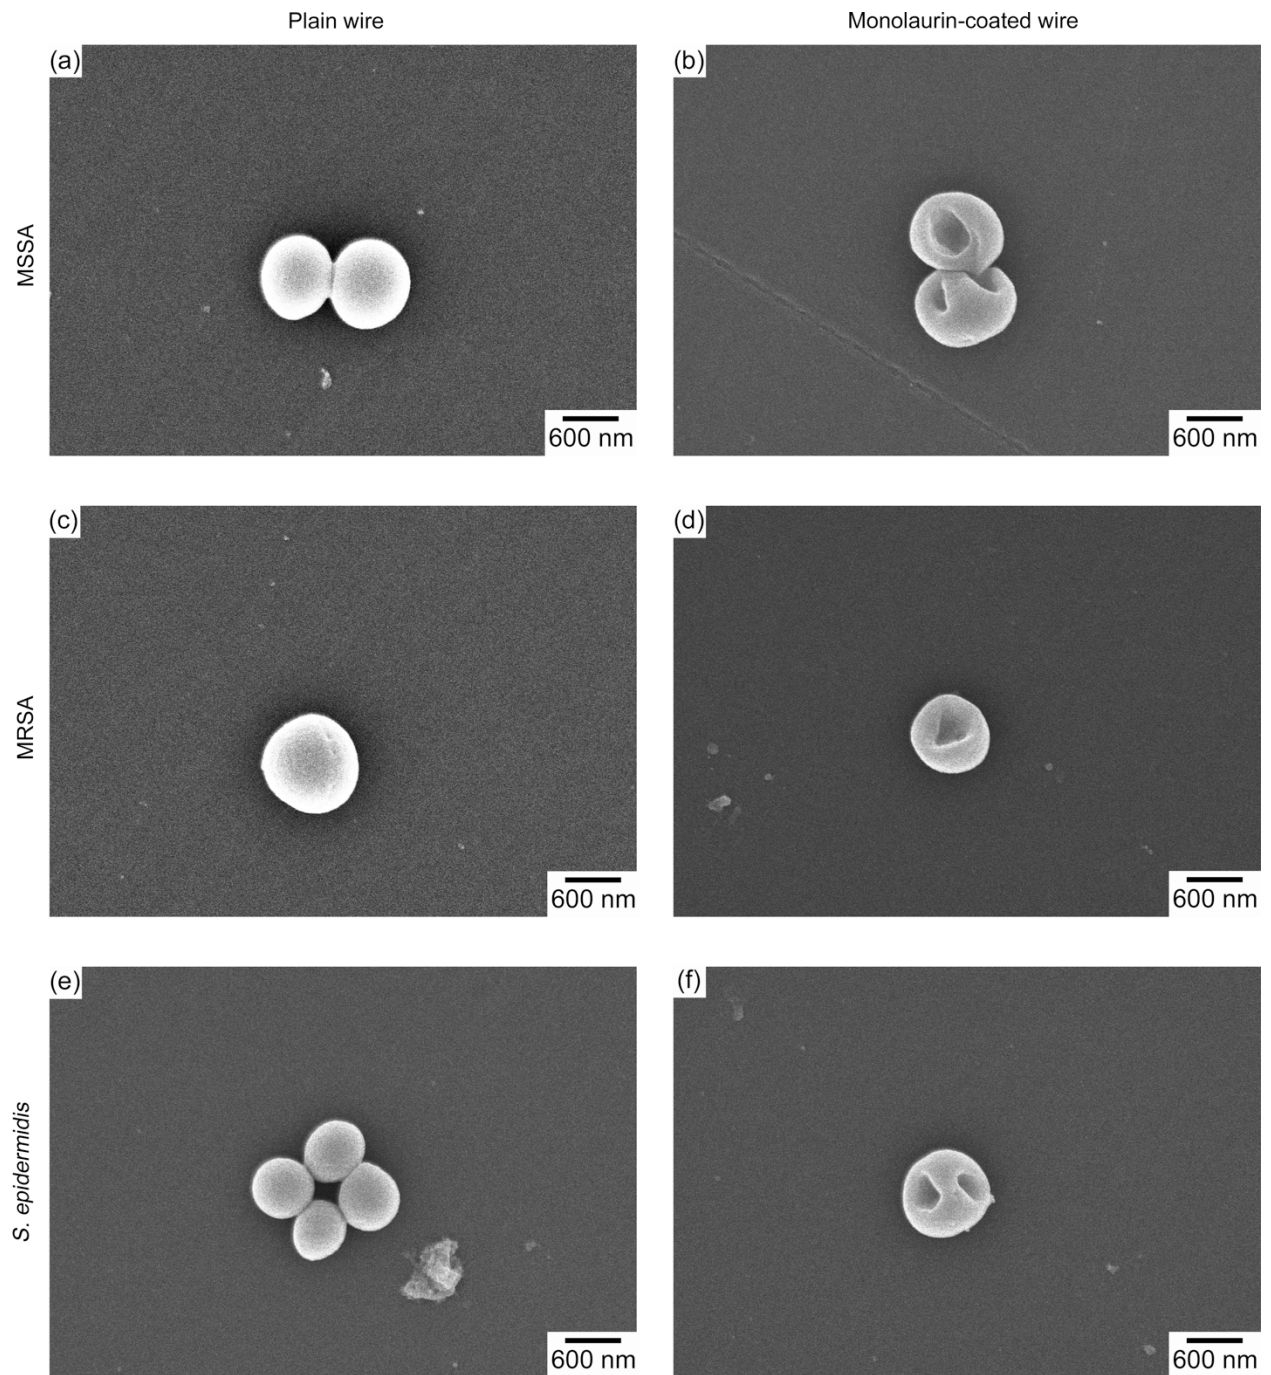

**Figure S4.** SEM micrographs of the bacteria adherent to plain and monolaurin-coated K-wires. (a) MSSA adherent to the plain wire; (b) MSSA adherent to the monolaurin-coated wire; (c) MRSA adherent to the plain wire; (d) MRSA adherent to the monolaurin-coated wire; (e) *S.*

*epidermidis* adherent to the plain wire; (e) *S. epidermidis* adherent to the monolaurin-coated wire.

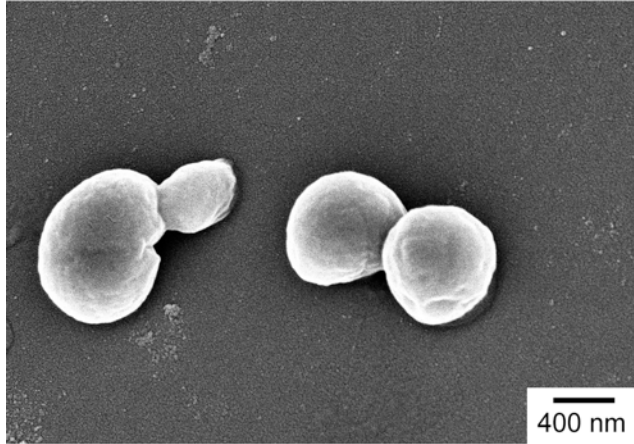

**Figure S5.** Higher resolution (30,000X) image of the left part of Fig. 7b. Evident of damage to microbial cell walls, which is not obvious at lower resolution.
